# Supplementary material for: Addressing inaccuracies in BLOSUM computation improves homology search performance
Source: PubMed Central journal article supplement (PMC4849092; doi:10.1186/s12859-016-1060-3), 2016-04-27

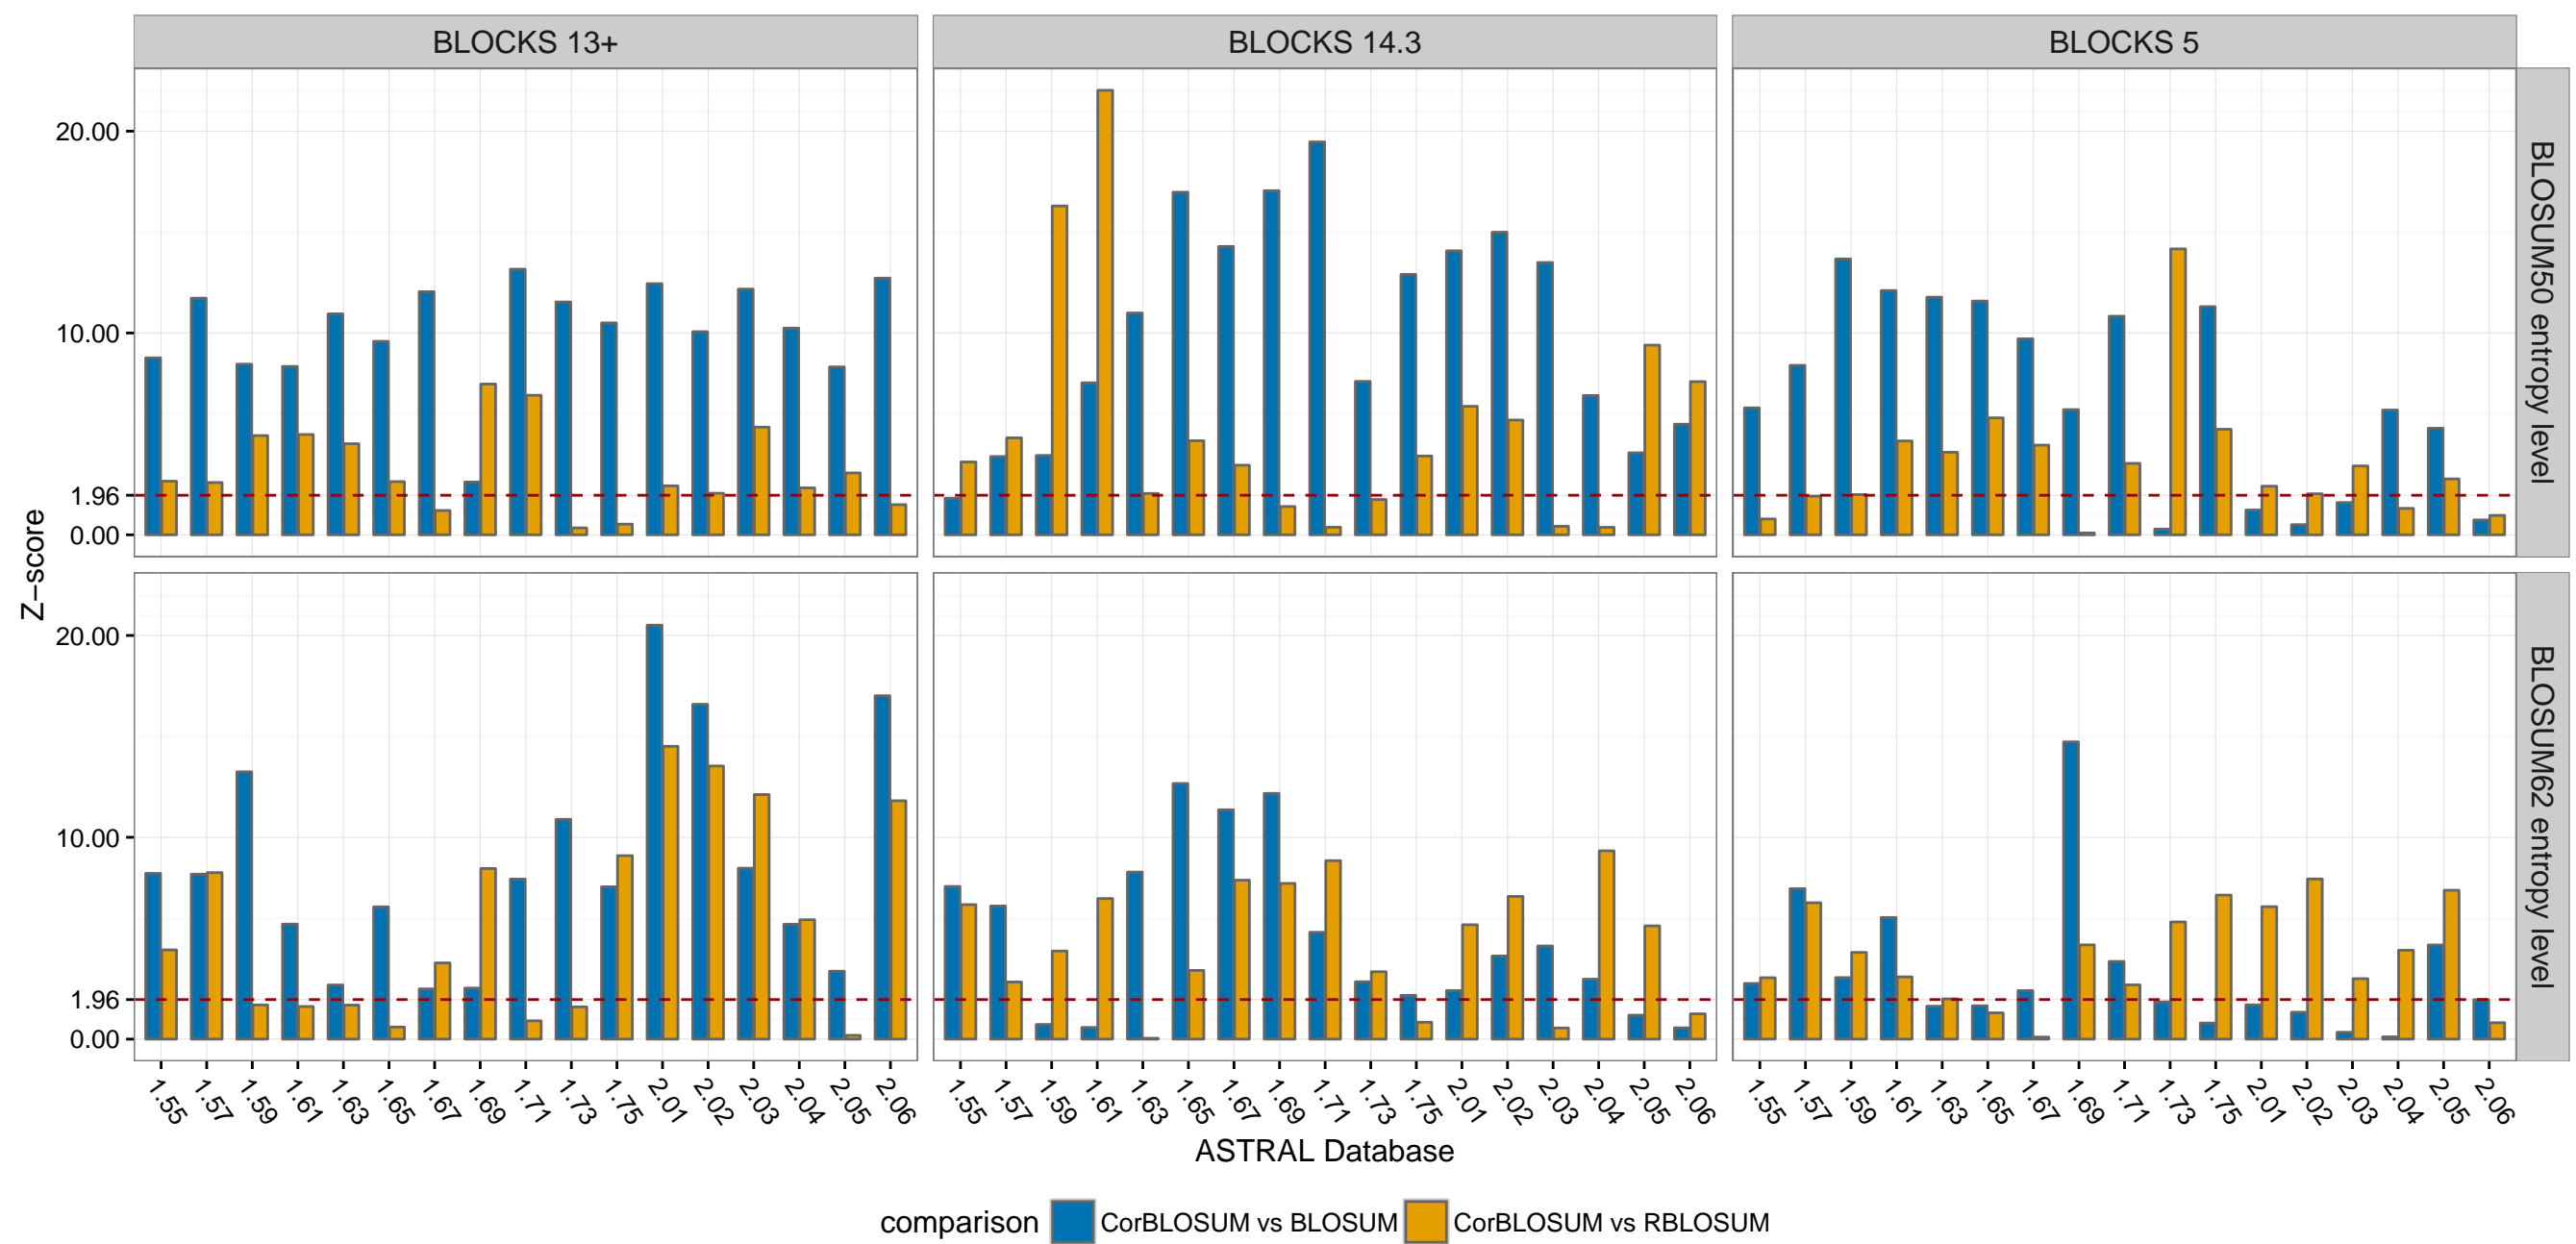

Supplement: 12859_2016_1060_MOESM9_ESM.pdf [file 12859_2016_1060_MOESM9_ESM.pdf]
